## Diastolic Function

### *A Barometer for Cardiovascular Risk?*

**P**ERIOPERATIVE cardiovascular risk assessment has undergone significant advances, including development and validation of multivariable risk indices for prediction of major cardiac complications,<sup>1–3</sup> advances in detecting ischemic heart disease, and noninvasive detection of symptomatic reductions in left ventricular (LV) ejection fraction.<sup>4</sup> However, we have recently recognized that current preoperative assessments may fail to fully appreciate a patient's vulnerability after a major noncardiac surgery, because early and late cardiac events can occur in the absence of coronary artery disease or heart failure symptoms.<sup>5–7</sup> In this issue of ANESTHESIOLOGY, Flu *et al.*<sup>8</sup> extend these findings, identifying the effect that subclinical LV systolic and diastolic dysfunction (DD) has on postoperative outcomes in patients undergoing open vascular or endovascular surgery. Because the current American College of Cardiology/American Heart Association perioperative guidelines fall short in discussing the clinical implications of DD, a closer look at this disorder is warranted.

Diastolic dysfunction and diastolic heart failure are not synonymous. The former refers to a preclinical state involving abnormalities in cardiac filling, which result from a combination of slowed LV relaxation and increased stiffness, usually associated with hypertension, diabetes, or ischemia. In contrast, diastolic heart failure, also called heart failure with normal ejection fraction, is the presence of signs and symptoms of heart failure with a normal ejection fraction (>50%), in the absence of significant valvular and pericardial disease, usually with echocardiographic or angiographic evidence of DD.<sup>9</sup> Diastolic heart failure is a true heart failure syndrome, producing nearly identical signs and symptoms, as well as alterations in neurohormonal activation and impairments in exercise tolerance and exercise cardiac output, similar to those with heart failure associated with reduced ejection fraction.<sup>10,11</sup>

Diastolic dysfunction is also a real disorder that merits clinical recognition, prevention, and treatment. Asymptomatic DD is common in the general population, even in patients without heart failure,<sup>12</sup> it increases with age and is particularly prevalent among older women with systemic hy-

pertension and ventricular hypertrophy. The presence of DD alone predicts worse outcome, with a worsening prognosis as the degree of DD increases.<sup>12</sup> Furthermore, up to 50% of all heart failure patients have a normal ejection fraction ( $\geq 0.50$ ) in the absence of major valve disease.<sup>13,14</sup> Compared with classic systolic heart failure, DD is increasing in incidence and prevalence,<sup>13,15,16</sup> triggers at least as many hospitalizations and healthcare expenditures as possible,<sup>17</sup> causes equivalent exercise intolerance,<sup>18</sup> and has a nearly similar death rate,<sup>14</sup> particularly among older patients who are hospitalized.

Work to date has suggested that diastolic function may be an additional barometer of cardiovascular risk not only in patients with established symptomatic heart disease<sup>19–23</sup> but also in patients undergoing major cardiothoracic and vascular surgery. In patients undergoing coronary artery bypass graft surgery, Doppler-derived markers of DD were found to be more accurate in predicting cardiac events and mortality than traditional risk scores, including preoperative LV ejection fraction.<sup>24,25</sup> Preoperative DD, defined by the transmitral peak early filling velocity-to-late diastolic filling velocity (E/A) ratio or transmitral peak early filling velocity-to-early diastolic annular velocity (E/e') ratio, before cardiac surgery has also been shown to be associated with the need for early inotropic support and increased intensive care unit length of stay.<sup>26,27</sup> Similarly, reductions in transmitral flow propagation velocity predicts postoperative heart failure and prolonged hospital stay after major vascular surgery.<sup>28</sup>

In their eloquent study reported in this journal, Flu *et al.*<sup>8</sup> included an important and a timely information to the prognostic value of preclinical LV dysfunction in patients undergoing vascular surgery. They examined the independent contribution of (1) asymptomatic isolated DD as defined by conventional Doppler parameters,<sup>29</sup> or (2) asymptomatic systolic dysfunction (defined by LV ejection fraction less than 50% with or without accompanying DD) for predicting 30-day cardiovascular events and longer term mortality in 1,005 consecutive patients, undergoing open vascular or

◆ This Editorial View accompanies the following article: Flu W-J, van Kuijk J-P, Hoeks SE, Kuiper R, Schouten O, Goei D, Elhendy A, Verhagen HJM, Thomson IR, Bax JJ, Fleisher LA, Poldermans D: Prognostic implications of asymptomatic left ventricular dysfunction in patients undergoing vascular surgery. ANESTHESIOLOGY 2010; 112:1316–24.

Accepted for publication February 5, 2010. Supported in part by grants K08 AG-026764-04 and RO1-AG033727-01 (to Dr. Groban) and R37AG18915 and P30AG21332 (to Dr. Kitman) from the Paul Beeson Award, National Institutes of Aging (Bethesda, Maryland).

endovascular surgery. All patients were followed up for a mean of 26 months. Interestingly, of the patients with overall LV dysfunction ( $n = 506/1005$ ), 80% ( $n = 405$ ) were without heart failure symptoms. The majority of these patients ( $n = 205$ ) had isolated DD that corresponds to the widespread occurrence of preclinical diastolic function abnormalities noted in the general population.<sup>12</sup> Although preclinical systolic dysfunction portended a greater in-hospital risk for cardiovascular events than isolated DD (odds ratio 2.3, 95% confidence interval 1.4–3.6), the risk associated with DD was not trivial—the probability of cardiac events was nearly twice that of the patient with normal LV function (odds ratio 1.8, 95% confidence interval 1.1–2.9). Furthermore, patients with preoperative DD had three times the risk of cardiac death than those found not to have LV dysfunction (hazard ratio 3.0, 95% confidence interval 1.5–6.0), and those with asymptomatic systolic dysfunction had nearly five times the risk of death when compared with patients with normal LV function. In summary, the authors found that asymptomatic LV dysfunction, whether due primarily to diastolic or to systolic dysfunction, independently predicted unfavorable outcomes in their patients who underwent open vascular procedures.

These important results regarding the predictive value of DD are not surprising. Normal diastolic function enables the left ventricle to quickly adapt to the varying loading conditions typical of the perioperative state. Furthermore, one of the earliest manifestations of ischemia is abnormal diastolic function.<sup>30</sup> This is because diastolic function depends not only on passive properties but is also an active, adenosine triphosphate-requiring process, thus providing a quick and reliable “barometer” of myocardial health.

This study also has some limitations. First, there was no differentiation between the stages of DD. Does early diastolic impairment ( $E/A < 0.8$ ) portend the same risk as more advanced stages ( $E/A > 2$ )? Certainly, the restrictive filling pattern of the LV has been shown to independently predict mortality after a myocardial infarction,<sup>31</sup> in patients with hypertrophic cardiomyopathy,<sup>32</sup> and in patients with severely reduced LV ejection fraction.<sup>33</sup> Second, because conventional diastolic parameters are highly influenced by changes in volume status, blood pressure, and heart rate, and the Doppler examinations were performed in the immediate preoperative period, following overnight fasting and presumably bowel preparation, there may have been an underestimation of the prevalence of advanced DD with seemingly even higher perioperative risk. The authors recognize this limitation and suggest that load-independent measures, such as early diastolic flow propagation velocity, or mitral annular velocity,<sup>29</sup> in conjunction with the E/A ratio could better characterize DD.

So what are the clinical implications of this study? With the changing demographics of our patients, we will need more robust biomarkers and noninvasive imaging techniques to aid in identification of patients who are at higher risk than suspected on clinical grounds alone. This study indicates that

detection of preclinical LV dysfunction will improve risk estimates and should enable intensified management of perioperative therapy aimed toward mitigating cardiovascular events. These strategies might include optimization of preoperative cardiac medications, enhanced monitoring, specialized fluid management strategies, or more intensive postoperative surveillance, although the relative merit of these interventions is currently unknown. In a prior publication from this same data set, Flu *et al.*<sup>34</sup> showed that patients are often not managed preoperatively with standard medications. Nonetheless, in ambulatory, nonperioperative patients with overt, symptomatic diastolic heart failure, clinical trials of angiotensin-converting enzyme inhibitors (Perindopril for Elderly People with Chronic Heart Failure), angiotensin receptor antagonism (I-PRESERVE), digoxin, and  $\beta$ -adrenergic antagonism (SENIORS) with Nebivolol (Menarini Ricerche S.p.A., Bologna, Italy) have not convincingly demonstrated reductions in morbidity and mortality.<sup>35</sup> Accordingly, current American College of Cardiology/American Heart Association management guidelines have assigned all therapies aside from the treatment of hypertension to a “C” level of evidence.<sup>36</sup> Given the paucity of data, management of these patients with overt DD in the perioperative period is presently based on individualized, empiric principles, such as careful fluid management and control of hypertension and tachycardia.

Importantly, the data from Flu *et al.*<sup>8</sup> indicate that identification of subclinical LV dysfunction by the resting Doppler echocardiogram could be used to frame specific therapeutic patient care decisions, for example, open *versus* minimally invasive surgical approach. In this study, adverse outcomes among the patients receiving endovascular repair ( $n = 356$ ) were only associated with those patients with preoperative symptomatic LV dysfunction; odds ratio for 30-day cardiovascular events was 1.8 (95% confidence interval 1.1–2.9), and the odds ratio for long-term cardiovascular mortality was 10.3 (95% confidence interval 5.4–19.3).

Thus, the study by Flu *et al.*<sup>8</sup> has made an important contribution to the literature on the perioperative cardiovascular risks associated with asymptomatic LV dysfunction. Taken together with the prior studies of Hammill *et al.*<sup>5</sup> and Hernandez *et al.*,<sup>6</sup> it is our opinion that there has evolved strong enough support for the following modification of the 2009 American College of Cardiology/American Heart Association Preoperative Cardiac Risk Assessment Guidelines: Resting echocardiography for assessment of LV systolic and diastolic function in asymptomatic patients undergoing high-risk noncardiac surgery is recommended.

**Leanne Groban, M.D., Dalane W. Kitzman, M.D.,** Departments of Anesthesiology and Internal Medicine, Section on Cardiology, Sticht Center of Aging, Wake Forest University School of Medicine, Winston-Salem, North Carolina. lgroban@wfubmc.edu

## References

1. Goldman L, Caldera DL, Nussbaum SR, Southwick FS, Krogstad D, Murray B, Burke DS, O'Malley TA, Goroll AH,

- Caplan CH, Nolan J, Carabello B, Slater EE: Multifactorial index of cardiac risk in noncardiac surgical procedures. *N Engl J Med* 1977; 297:845-50
2. Detsky AS, Abrams HB, Forbath N, Scott JG, Hilliard JR: Cardiac assessment for patients undergoing noncardiac surgery. A multifactorial clinical risk index. *Arch Intern Med* 1986; 146:2131-4
3. Lee TH, Marcantonio ER, Mangione CM, Thomas EJ, Polanczyk CA, Cook EF, Sugarbaker DJ, Donaldson MC, Poss R, Ho KK, Ludwig LE, Pedan A, Goldman L: Derivation and prospective validation of a simple index for prediction of cardiac risk of major noncardiac surgery. *Circulation* 1999; 100:1043-9
4. Fleisher LA, Beckman JA, Brown KA, Calkins H, Chaikof EL, Fleischmann KE, Freeman WK, Froehlich JB, Kasper EK, Kersten JR, Riegel B, Robb JF: 2009 ACCF/AHA focused update on perioperative beta blockade incorporated into the ACC/AHA 2007 guidelines on perioperative cardiovascular evaluation and care for noncardiac surgery: A report of the American college of cardiology foundation/American heart association task force on practice guidelines. *Circulation* 2009; 120:e169-276
5. Hammill BG, Curtis LH, Bennett-Guerrero E, O'Connor CM, Jollis JG, Schulman KA, Hernandez AF: Impact of heart failure on patients undergoing major noncardiac surgery. *ANESTHESIOLOGY* 2008; 108:559-67
6. Hernandez AF, Whellan DJ, Stroud S, Sun JL, O'Connor CM, Jollis JG: Outcomes in heart failure patients after major noncardiac surgery. *J Am Coll Cardiol* 2004; 44:1446-53
7. Xu-Cai YO, Brotman DJ, Phillips CO, Michota FA, Tang WH, Whinney CM, Panneerselvam A, Hixson ED, Garcia M, Francis GS, Jaffer AK: Outcomes of patients with stable heart failure undergoing elective noncardiac surgery. *Mayo Clin Proc* 2008; 83:280-8
8. Flu W-J, van Kuijk J-P, Hoeks SE, Kuiper R, Schouten O, Goei D, Elhendy A, Verhagen HJM, Thomson IR, Bax JJ, Fleisher LA, Poldermans D: Prognostic implications of asymptomatic left ventricular dysfunction in patients undergoing vascular surgery. *ANESTHESIOLOGY* 2010; 112:1316-24
9. Paulus WJ, Tschöpe C, Sanderson JE, Rusconi C, Flachskampf FA, Rademakers FE, Marino P, Smiseth OA, De Keulenaer G, Leite-Moreira AF, Borbély A, Edes I, Handoko ML, Heymans S, Pezzali N, Pieske B, Dickstein K, Fraser AG, Brutsaert DL: How to diagnose diastolic heart failure: A consensus statement on the diagnosis of heart failure with normal left ventricular ejection fraction by the Heart Failure and Echocardiography Associations of the European Society of Cardiology. *Eur Heart J* 2007; 28:2539-50
10. Kitzman DW, Little WC, Brubaker PH, Anderson RT, Hundley WG, Marburger CT, Brosnihan B, Morgan TM, Stewart KP: Pathophysiological characterization of isolated diastolic heart failure in comparison to systolic heart failure. *JAMA* 2002; 288:2144-50
11. Kitzman DW, Higginbotham MB, Cobb FR, Sheikh KH, Sullivan MJ: Exercise intolerance in patients with heart failure and preserved left ventricular systolic function: Failure of the Frank-Starling mechanism. *J Am Coll Cardiol* 1991; 17:1065-72
12. Redfield MM, Jacobsen SJ, Burnett JC Jr, Mahoney DW, Bailey KR, Rodeheffer RJ: Burden of systolic and diastolic ventricular dysfunction in the community: Appreciating the scope of the heart failure epidemic. *JAMA* 2003; 289:194-202
13. Kitzman DW, Gardin JM, Gottdiener JS, Arnold A, Boineau R, Aurigemma G, Marino EK, Lyles M, Cushman M, Enright PL; Cardiovascular Health Study Research Group: Importance of heart failure with preserved systolic function in patients  $\geq 65$  years of age. CHS Research Group. Cardiovascular Health Study. *Am J Cardiol* 2001; 87:413-9
14. Owan TE, Hodge DO, Herges RM, Jacobsen SJ, Roger VL, Redfield MM: Trends in prevalence and outcome of heart failure with preserved ejection fraction. *N Engl J Med* 2006; 355:251-9
15. Senni M, Tribouillois CM, Rodeheffer RJ, Jacobsen SJ, Evans JM, Bailey KR, Redfield MM: Congestive heart failure in the community: A study of all incident cases in Olmsted County, Minnesota, in 1991. *Circulation* 1998; 98:2282-9
16. Vasan RS, Larson MG, Benjamin EJ, Evans JC, Reiss CK, Levy D: Congestive heart failure in subjects with normal *versus* reduced left ventricular ejection fraction: Prevalence and mortality in a population-based cohort. *J Am Coll Cardiol* 1999; 33:1948-55
17. Liao L, Jollis JG, Anstrom KJ, Whellan DJ, Kitzman DW, Aurigemma GP, Mark DB, Schulman KA, Gottdiener JS: Costs for heart failure with normal *vs* reduced ejection fraction. *Arch Intern Med* 2006; 166:112-8
18. Kitzman DW, Groban L: Exercise intolerance. *Heart Fail Clin* 2008; 4:99-115
19. Wang M, Yip GW, Wang AY, Zhang Y, Ho PY, Tse MK, Lam PK, Sanderson JE: Peak early diastolic mitral annulus velocity by tissue Doppler imaging adds independent and incremental prognostic value. *J Am Coll Cardiol* 2003; 41:820-6
20. Okura H, Takada Y, Kubo T, Iwata K, Mizoguchi S, Taguchi H, Toda I, Yoshikawa J, Yoshida K: Tissue Doppler-derived index of left ventricular filling pressure, E/e', predicts survival of patients with non-valvular atrial fibrillation. *Heart* 2006; 92:1248-52
21. Hillis GS, Möller JE, Pellikka PA, Gersh BJ, Wright RS, Ommen SR, Reeder GS, Oh JK: Noninvasive estimation of left ventricular filling pressure by E/e' is a powerful predictor of survival after acute myocardial infarction. *J Am Coll Cardiol* 2004; 43:360-7
22. Möller JE, Pellikka PA, Hillis GS, Oh JK: Prognostic importance of diastolic function and filling pressure in patients with acute myocardial infarction. *Circulation* 2006; 114:438-44
23. Dokainish H, Zoghbi WA, Lakkis NM, Ambriz E, Patel R, Quinones MA, Nagueh SF: Incremental predictive power of B-type natriuretic peptide and tissue Doppler echocardiography in the prognosis of patients with congestive heart failure. *J Am Coll Cardiol* 2005; 45:1223-6
24. Liu J, Tanaka N, Murata K, Ueda K, Wada Y, Oyama R, Matsuzaki M: Prognostic value of pseudonormal and restrictive filling patterns on left ventricular remodeling and cardiac events after coronary artery bypass grafting. *Am J Cardiol* 2003; 91:550-4
25. Merello L, Riesle E, Alburquerque J, Torres H, Aránguiz-Santander E, Pedemonte O, Westerberg B: Risk scores do not predict high mortality after coronary artery bypass surgery in the presence of diastolic dysfunction. *Ann Thorac Surg* 2008; 85:1247-55
26. Bernard F, Denault A, Babin D, Goyer C, Couture P, Couturier A, Buithieu J: Diastolic dysfunction is predictive of difficult weaning from cardiopulmonary bypass. *Anesth Analg* 2001; 92:291-8
27. Groban L, Sanders DM, Houle TT, Antonio BL, Ntuen EC, Zvara DA, Kon ND, Kincaid EH: Prognostic value of tissue Doppler-derived E/e' on early morbid events after cardiac surgery. *Echocardiography* 2010; 27:131-8
28. Matyal R, Hess PE, Subramaniam B, Mitchell J, Panzica PJ, Pomposelli F, Mahmood F: Perioperative diastolic dysfunction during vascular surgery and its association with postoperative outcome. *J Vasc Surg* 2009; 50:70-6
29. Nagueh SF, Appleton CP, Gillebert TC, Marino PN, Oh JK, Smiseth OA, Waggoner AD, Flachskampf FA, Pellikka PA, Evangelista A: Recommendations for the evaluation of left ventricular diastolic function by echocardiography. *Eur J Echocardiogr* 2009; 10:165-93
30. Grossman W, Momomura SI, Ingwall JS: Diastolic relax-

- ation abnormalities during ischaemia and their association with high energy phosphate depletion, intracellular pH and myocardial blood flow. *Basic Res Cardiol* 1987; 82(Suppl 2):289-99
31. Meta-Analysis Research Group in Echocardiography (MeRGE) AMI Collaborators, Möller JE, Whalley GA, Dini FL, Doughty RN, Gamble GD, Klein AL, Quintana M, Yu CM: Independent prognostic importance of a restrictive left ventricular filling pattern after myocardial infarction: An individual patient meta-analysis: Meta-Analysis Research Group in Echocardiography acute myocardial infarction. *Circulation* 2008; 117:2591-8
  32. Biagini E, Spirito P, Rocchi G, Ferlito M, Rosmini S, Lai F, Lorenzini M, Terzi F, Bacchi-Reggiani L, Boriani G, Branzi A, Boni L, Rapezzi C: Prognostic implications of the Doppler restrictive filling pattern in hypertrophic cardiomyopathy. *Am J Cardiol* 2009; 104:1727-31
  33. Shen WF, Tribouilloy C, Rey JL, Baudhuin JJ, Boey S, Dufossé H, Lesbre JP: Prognostic significance of Doppler-derived left ventricular diastolic filling variables in dilated cardiomyopathy. *Am Heart J* 1992; 124:1524-33
  34. Flu WJ, van Kuijk JP, Galal W, Kuiper R, van de Ven LL, Verhagen HJ, Bax JJ, Poldermans D: Prevalence and pharmacological treatment of left-ventricular dysfunction in patients undergoing vascular surgery. *Eur J Heart Fail* 2010; 12:288-93
  35. Thohan V, Patel S: The challenges associated with current clinical trials for diastolic heart failure. *Curr Opin Cardiol* 2009; 24:230-8
  36. Hunt SA, Abraham WT, Chin MH, Feldman AM, Francis GS, Ganiats TG, Jessup M, Konstam MA, Mancini DM, Michl K, Oates JA, Rahko PS, Silver MA, Stevenson LW, Yancy CW: 2009 focused update incorporated into the ACC/AHA 2005 Guidelines for the Diagnosis and Management of Heart Failure in Adults: A report of the American College of Cardiology Foundation/American Heart Association Task Force on Practice Guidelines: Developed in collaboration with the International Society for Heart and Lung Transplantation. *Circulation* 2009; 119:e391-479
